# Supplementary material for: Prebiotic galactooligosaccharides production from lactose and lactulose by Lactobacillus delbrueckii subsp. bulgaricus CRL450
Source: Royal Society of Chemistry journal article supplement (doi:10.1039/d0fo00942c), 2020-01-01

**Table S1** Some growth parameters of *L. bulgaricus* CRL 450 after 24 h of incubation with purified Vivinal-GOS, *A. oryzae*-OsLu, CRL450-GOS and CRL450-OsLu. Data are means of two independent assays ( $\pm$ SD)

| Growth parameters    | Purified Vivinal | Purified Ao-OsLu | Purified CRL450 GOS | Purified CRL450 OsLu |
|----------------------|------------------|------------------|---------------------|----------------------|
| OD600 <sub>max</sub> | 0.13 $\pm$ 0.06  | 0.16 $\pm$ 0.07  | 0.21 $\pm$ 0.01     | 0.17 $\pm$ 0.00      |
| Final pH             | 5.60 $\pm$ 0.07  | 5.51 $\pm$ 0.02  | 5.03 $\pm$ 0.02     | 5.19 $\pm$ 0.02      |
| Lactic acid (mg/mL)  | 1.33 $\pm$ 0.17  | 1.32 $\pm$ 0.00  | 1.18 $\pm$ 0.00     | 1.45 $\pm$ 0.00      |

**Figure S1** Monitoring of ONPG hydrolysis (pH 6.5, 40 °C) by  $\beta$ -galactosidase enzyme contained in the cell-free extract (CFE) of representative lactobacilli from collection of CERELA-CONICET (CRL), (codes in Table 1). The data are the means of two determinations of two independent assays (n=4). (Code Table 1).

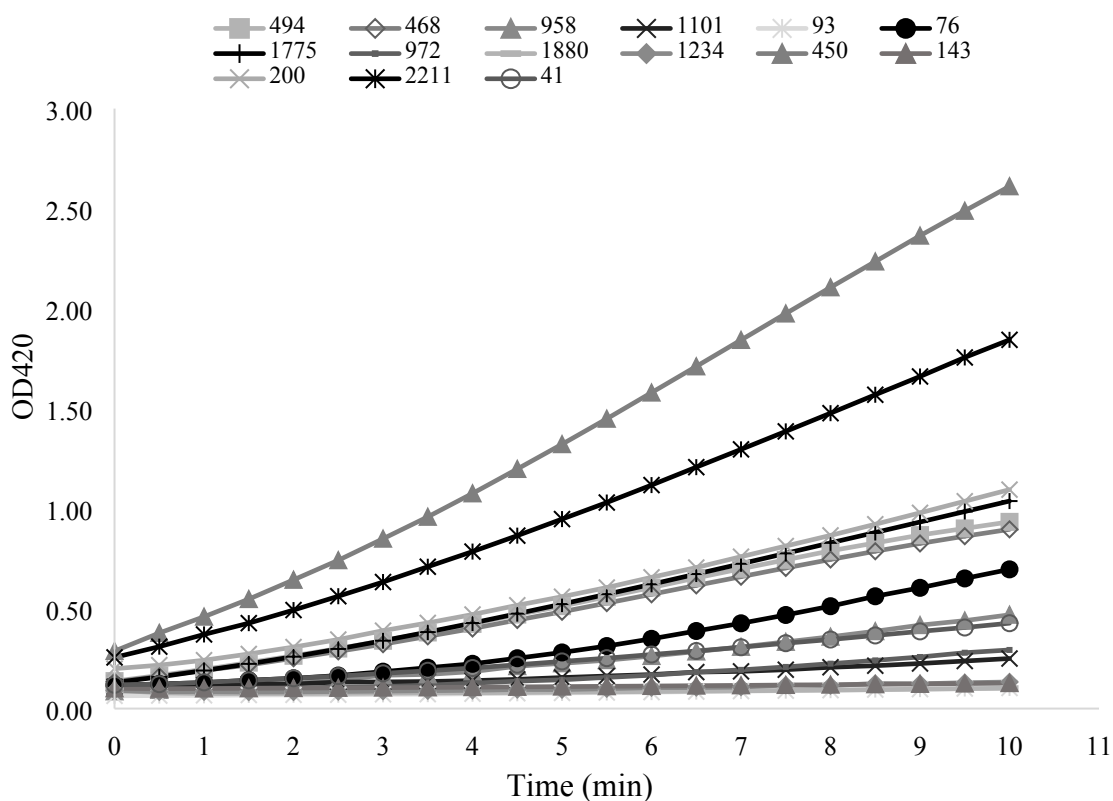

**Figure S2** Synthesis of oligosaccharides by different enzymes. Oligosaccharide mixtures are identified as follows: lane 1, Mix1 (galactose + lactose); lane 2, Mix2 (raffinose + stachyose); lane 3, *L. bulgaricus* CRL468 oligosaccharides; lane 4, *L. bulgaricus* CRL450 oligosaccharides; lane 5, Vivinal GOS oligosaccharides.

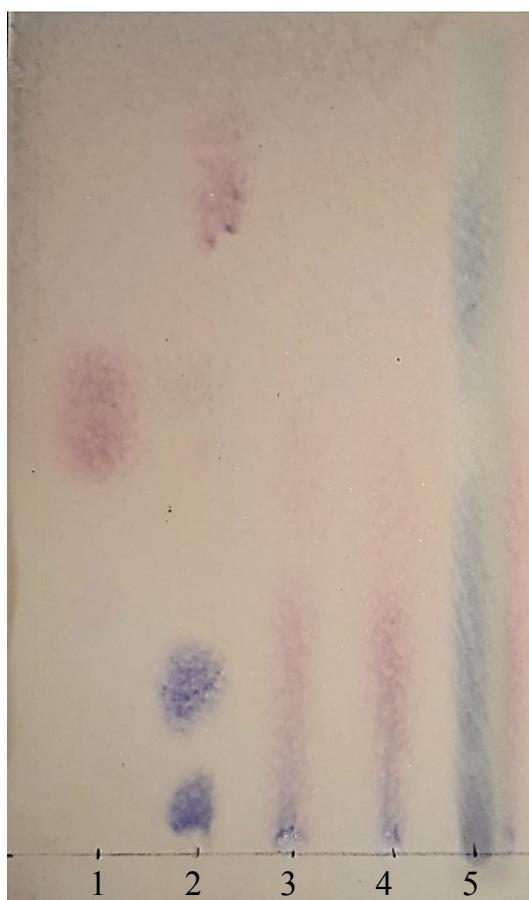

Supplement: d0fo00942c1.pdf [file d0fo00942c1.pdf]
